# Supplementary material for: The Effect of the Donor’s and Recipient’s Sex on Red Blood Cells Evaluated Using Transfusion Simulations
Source: MDPI journal article supplement (doi:10.3390/cells12111454), 2023-05-23
Supplement: s1 [file s1]

# Supplementary Data

**Table S1. Standard blood parameters of individual RCCs and donor information**

**“Flask Model” (4 replicates)**

| Storage Day       | 2     | 42 | 2     | 42 | 2     | 42 | 2     | 42 | 2     | 42   | 2     | 42   | 2     | 42   | 2     | 42   | 2     | 42   | 2      | 42   | 2      | 42   | 2      | 42   | 2      | 42   | 2      | 42   | 2      | 42   | 2      | 42   |
|-------------------|-------|----|-------|----|-------|----|-------|----|-------|------|-------|------|-------|------|-------|------|-------|------|--------|------|--------|------|--------|------|--------|------|--------|------|--------|------|--------|------|
| RCC               | 1 (♂) |    | 2 (♂) |    | 3 (♀) |    | 4 (♀) |    | 5 (♂) |      | 6 (♂) |      | 7 (♀) |      | 8 (♀) |      | 9 (♂) |      | 10 (♂) |      | 11 (♀) |      | 12 (♀) |      | 13 (♂) |      | 14 (♂) |      | 15 (♀) |      | 16 (♀) |      |
| Hb (g/L)          | /     | /  | /     | /  | /     | /  | /     | /  | 208   | 208  | 208   | 204  | 176   | 186  | 186   | 190  | 198   | 194  | 206    | 210  | 180    | 182  | 192    | 200  | 206    | 204  | 212    | 210  | 198    | 198  | 182    | 182  |
| HCT (%)           | /     | /  | /     | /  | /     | /  | /     | /  | 60    | 63   | 61    | 62   | 55    | 57   | 56    | 57   | 61    | 62   | 63     | 66   | 53     | 56   | 56     | 60   | 59     | 62   | 60     | 64   | 58     | 59   | 58     | 60   |
| Hemolysis (%)     | /     | /  | /     | /  | /     | /  | /     | /  | 0.06  | 0.26 | 0.08  | 0.48 | 0.05  | 0.18 | 0.05  | 0.28 | 0.05  | 0.71 | 0.05   | 0.21 | 0.05   | 0.25 | 0.07   | 0.62 | 0.29   | 0.65 | 0.20   | 0.59 | 0.38   | 0.95 | 0.02   | 0.26 |
| Donor age (years) | 27    |    | 20    |    | 24    |    | 24    |    | 39    |      | 25    |      | 32    |      | 34    |      | 38    |      | 35     |      | 21     |      | 35     |      | 22     |      | 25     |      | 34     |      | 26     |      |
| ABO RhD           | O+    |    | O+    |    | O+    |    | O+    |    | A+    |      | A+    |      | A+    |      | A+    |      | A+    |      | A+     |      | A+     |      | A+     |      | A+     |      | A+     |      | A+     |      | A+     |      |

**“Plate Model” (2 replicates)**

| Storage Day       | 2     | 43   | 2     | 43   | 2     | 43   | 2     | 43   | 2     | 43   | 2     | 43   | 2     | 43   | 2     | 43   | 2     | 43   | 2      | 43   | 2      | 43   |
|-------------------|-------|------|-------|------|-------|------|-------|------|-------|------|-------|------|-------|------|-------|------|-------|------|--------|------|--------|------|
| RCC               | 1 (♂) |      | 2 (♂) |      | 3 (♂) |      | 4 (♀) |      | 5 (♀) |      | 6 (♂) |      | 7 (♂) |      | 8 (♂) |      | 9 (♀) |      | 10 (♀) |      | 11 (♀) |      |
| Hb (g/L)          | 230   | 230  | 216   | 210  | 212   | 214  | 178   | 182  | 190   | 190  | 188   | 210  | 188   | 198  | 194   | 202  | 180   | 184  | 204    | 184  | 184    | 192  |
| HCT (%)           | 61    | 68   | 62    | 67   | 61    | 72   | 53    | 57   | 57    | 58   | 58    | 67   | 59    | 61   | 60    | 67   | 56    | 59   | 61     | 60   | 58     | 62   |
| Hemolysis (%)     | 0.19  | 0.24 | 0.08  | 0.19 | 0.09  | 0.29 | 0.08  | 0.26 | 0.05  | 0.29 | 0.04  | 0.11 | 0.04  | 0.18 | 0.04  | 0.12 | 0.05  | 0.16 | 0.04   | 0.22 | 0.03   | 0.15 |
| Donor age (years) | 27    |      | 33    |      | 27    |      | 23    |      | 35    |      | 38    |      | 19    |      | 34    |      | 20    |      | 26     |      | 31     |      |
| ABO RhD           | O+    |      | A+    |      | A+    |      | O-    |      | A+    |      | A+    |      | O+    |      | A+    |      | A+    |      | O+     |      | A+     |      |

Hemoglobin (Hb), the hematocrit (HCT) and hemolysis were measured in the RCCs that were stored up to 43 days at 4 °C under blood-bank conditions. Furthermore, the donor age and ABO RhD are indicated.

**Table S2. Standard blood parameters of individual FFP units and donor information**

**“Flask Model” (4 replicates)**

**Replicate 1**

**Replicates 2-4**

| FFP          | Blood group | Donor age (year) | Storage (day) | FFP           | Blood group | Donor age (year) | Storage (day) |
|--------------|-------------|------------------|---------------|---------------|-------------|------------------|---------------|
| <b>1</b> (♂) | AB+         | 25               | 90            | <b>1</b> (♂)  | AB+         | 24               | 127           |
| <b>2</b> (♂) |             | 25               | 64            | <b>2</b> (♂)  |             | 30               | 133           |
| <b>3</b> (♂) |             | 25               | 62            | <b>3</b> (♂)  |             | 26               | 127           |
| <b>4</b> (♂) |             | 33               | 44            | <b>4</b> (♂)  |             | 22               | 135           |
| <b>5</b> (♂) |             | 27               | 28            | <b>5</b> (♂)  |             | 24               | 128           |
| <b>1</b> (♀) |             | 28               | 63            | <b>6</b> (♂)  |             | 28               | 44            |
| <b>2</b> (♀) |             | 27               | 64            | <b>7</b> (♂)  |             | 18               | 37            |
| <b>3</b> (♀) |             | 22               | 64            | <b>8</b> (♂)  |             | 24               | 37            |
| <b>4</b> (♀) |             | 27               | 65            | <b>9</b> (♂)  |             | 20               | 37            |
| <b>5</b> (♀) |             | 27               | 64            | <b>10</b> (♂) |             | 27               | 132           |
|              |             |                  |               | <b>11</b> (♂) | AB+         | 38               | 44            |
|              |             |                  |               | <b>12</b> (♂) |             | 28               | 37            |
|              |             |                  |               | <b>13</b> (♂) |             | 25               | 37            |
|              |             |                  |               | <b>14</b> (♂) |             | 34               | 33            |
|              |             |                  |               | <b>15</b> (♂) |             | 37               | 44            |
|              |             |                  |               | <b>1</b> (♀)  |             | 31               | 161           |
|              |             |                  |               | <b>2</b> (♀)  |             | 34               | 135           |
|              |             |                  |               | <b>3</b> (♀)  |             | 23               | 135           |
|              |             |                  |               | <b>4</b> (♀)  |             | 37               | 127           |
|              |             |                  |               | <b>5</b> (♀)  |             | 27               | 134           |
|              |             |                  |               | <b>6</b> (♀)  |             | 32               | 135           |
|              |             |                  |               | <b>7</b> (♀)  |             | 26               | 44            |
|              |             |                  |               | <b>8</b> (♀)  |             | 18               | 42            |
|              |             |                  |               | <b>9</b> (♀)  |             | 21               | 41            |
|              |             |                  |               | <b>10</b> (♀) |             | 37               | 33            |
|              |             |                  |               | <b>11</b> (♀) |             | 27               | 41            |
|              |             |                  |               | <b>12</b> (♀) |             | 25               | 37            |
|              |             |                  |               | <b>13</b> (♀) |             | 19               | 35            |
|              |             |                  |               | <b>14</b> (♀) |             | 31               | 44            |
|              |             |                  |               | <b>15</b> (♀) |             | 27               | 41            |

**“Plate Model” (2 replicates)**

**Replicate 1**

**Replicate 2**

| FFP           | ABO RhD | Donor age (year) | Storage (day) | FFP           | Blood group | Donor age (year) | Storage (day) |
|---------------|---------|------------------|---------------|---------------|-------------|------------------|---------------|
| <b>1 (♂)</b>  | AB+     | 31               | 495           | <b>1 (♂)</b>  | AB+         | 36               | 49            |
| <b>2 (♂)</b>  |         | 25               | 495           | <b>2 (♂)</b>  |             | 28               | 86            |
| <b>3 (♂)</b>  |         | 22               | 467           | <b>3 (♂)</b>  |             | 22               | 86            |
| <b>4 (♂)</b>  |         | 21               | 467           | <b>4 (♂)</b>  |             | 27               | 53            |
| <b>5 (♂)</b>  |         | 25               | 467           | <b>5 (♂)</b>  |             | 24               | 86            |
| <b>6 (♂)</b>  |         | 28               | 467           | <b>6 (♂)</b>  |             | 24               | 64            |
| <b>7 (♂)</b>  |         | 25               | 467           | <b>7 (♂)</b>  |             | 19               | 91            |
| <b>8 (♂)</b>  |         | 33               | 443           | <b>8 (♂)</b>  |             | 36               | 126           |
| <b>9 (♂)</b>  |         | 27               | 443           | <b>9 (♂)</b>  |             | 20               | 48            |
| <b>10 (♂)</b> |         | 24               | 408           | <b>10 (♂)</b> |             | 28               | 86            |
| <b>11 (♂)</b> |         | 30               | 408           | <b>11 (♂)</b> |             | 30               | 64            |
| <b>12 (♂)</b> |         | 24               | 408           | <b>12 (♂)</b> |             | 31               | 59            |
| <b>13 (♂)</b> |         | 24               | 328           | <b>13 (♂)</b> |             | 34               | 64            |
| <b>14 (♂)</b> |         | 20               | 328           | <b>14 (♂)</b> |             | 30               | 48            |
| <b>15 (♂)</b> |         | 38               | 328           | <b>15 (♂)</b> |             | 33               | 51            |
| <b>1 (♀)</b>  | AB+     | 27               | 495           | <b>1 (♀)</b>  | AB+         | 27               | 49            |
| <b>2 (♀)</b>  |         | 19               | 495           | <b>2 (♀)</b>  |             | 30               | 64            |
| <b>3 (♀)</b>  |         | 36               | 495           | <b>3 (♀)</b>  |             | 25               | 57            |
| <b>4 (♀)</b>  |         | 18               | 495           | <b>4 (♀)</b>  |             | 18               | 63            |
| <b>5 (♀)</b>  |         | 21               | 495           | <b>5 (♀)</b>  |             | 35               | 91            |
| <b>6 (♀)</b>  |         | 28               | 467           | <b>6 (♀)</b>  |             | 28               | 56            |
| <b>7 (♀)</b>  |         | 27               | 467           | <b>7 (♀)</b>  |             | 34               | 63            |
| <b>8 (♀)</b>  |         | 22               | 467           | <b>8 (♀)</b>  |             | 19               | 61            |
| <b>9 (♀)</b>  |         | 27               | 467           | <b>9 (♀)</b>  |             | 26               | 58            |
| <b>10 (♀)</b> |         | 23               | 408           | <b>10 (♀)</b> |             | 31               | 43            |
| <b>11 (♀)</b> |         | 18               | 328           | <b>11 (♀)</b> |             | 22               | 63            |
| <b>12 (♀)</b> |         | 21               | 328           | <b>12 (♀)</b> |             | 32               | 51            |
| <b>13 (♀)</b> |         | 27               | 328           | <b>13 (♀)</b> |             | 22               | 48            |
| <b>14 (♀)</b> |         | 19               | 328           | <b>14 (♀)</b> |             | 18               | 86            |
| <b>15 (♀)</b> |         | 31               | 328           | <b>15 (♀)</b> |             | 22               | 50            |

Donor sex, blood group and storage time (at -30 °C) of used FFP units are indicated.
